# Supplementary material for: Chemical composition, antioxidant and anti-inflammatory properties of Monarda didyma L. essential oil
Source: PeerJ. 2022 Nov 21;10:e14433. doi: 10.7717/peerj.14433 (PMC9686412; doi:10.7717/peerj.14433)
Supplement: Supplemental Information 4 — qRT-PCR raw data including statistical analysis performed by the two-tailed paired Student’s t-test with the exact p values. [file peerj-10-14433-s004.xlsx]

## Sheet: qRT-PCR
miR-146a
				Mean	SD			two-tailed paired t-test
CTRL	1	1	1	1	0		* vs CTRL	0.0463605	* CTRL vs LPS
LPS	0.65	0.2	0.4	0.416667	0.225462			0.00673408	* CTRL vs LPS + MdEO
LPS + MdEO	5	4	4.5	4.5	0.5			0.0106736	* CTRL vs MdEO
MdEO	4.33	5.8	5.3	5.14333	0.747418		° vs LPS	0.0015126	° LPS vs LPS + MdEO
								0.0137956	° LPS vs MdEO
IRAK-1				Mean	SD			two-tailed paired t-test
CTRL	1	1	1	1	0		* vs CTRL	0.0315379	* CTRL vs LPS
LPS	2.5	2.71945	1.88764	2.36903	0.41762			4.0574e-05	* CTRL vs LPS + MdEO
LPS + MdEO	0.02224	0.00310746	0.00352759	0.00962502	0.1			0.00380848	* CTRL vs MdEO
MdEO	0.2224	0.12	0.0352759	0.125892	0.1		° vs LPS	0.0108191	° LPS vs LPS + MdEO
								0.00917492	° LPS vs MdEO
IL-6				Mean	SD			two-tailed paired t-test
CTRL	1	1	1	1	0		* vs CTRL	0.0151256	* CTRL vs LPS
LPS	3.92519	4	5.22344	4.38288	0.625825			0.0104544	* CTRL vs LPS + MdEO
LPS + MdEO	0.301452	0.496718	0.3	0.366057	0.100112			0.00224425	* CTRL vs MdEO
MdEO	0.33	0.21	0.27	0.27	0.034641		° vs LPS	0.0125697	° LPS vs LPS + MdEO
								0.0104626	° LPS vs MdEO
